# Supplementary material for: Synthesis of stable CdS nanocrystals using experimental design: optimization of the emission
Source: Royal Society of Chemistry journal article supplement (doi:10.1039/c9nj02145k), 2019-01-01
Supplement: c9nj02145k1.pdf [file c9nj02145k1.pdf]

Supplementary Fig. 1

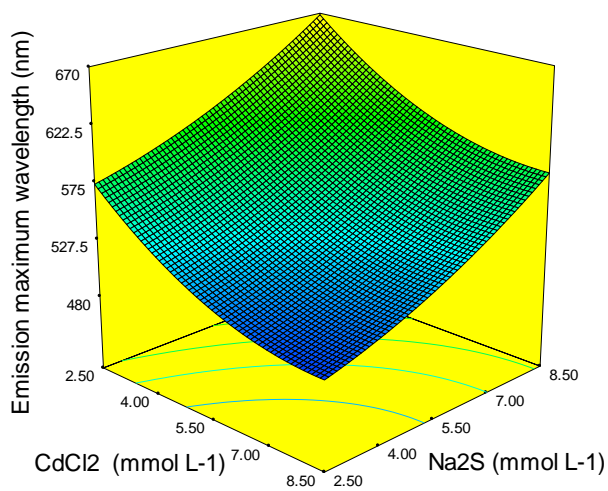

**Figure 1.** Response surface obtained for the CdS NCs synthesis as a function of the Emission maximum wavelength for  $c_{\text{MPA}}^* = 15 \times 10^{-3} \text{ mol L}^{-1}$  and  $T = 20 \text{ }^\circ\text{C}$ .

Supplementary Fig. 2

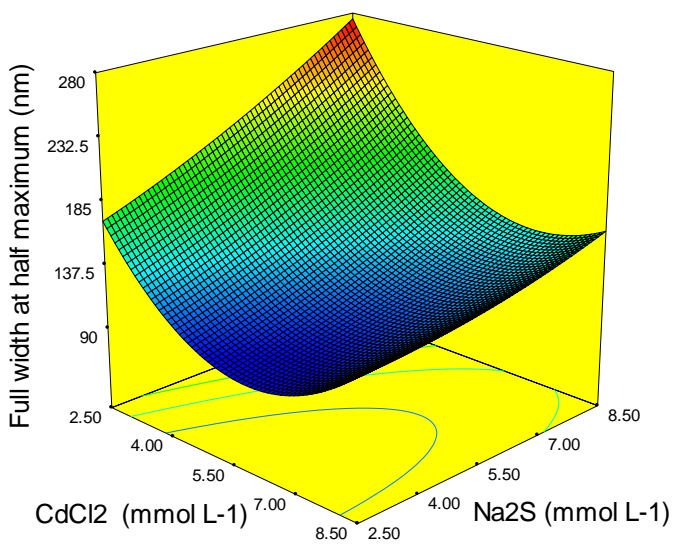

**Figure 2.** Response surface obtained for the CdS NCs synthesis as a function of the full width at half maximum for  $c_{\text{MPA}}^* = 15 \times 10^{-3} \text{ mol L}^{-1}$  and  $T = 20 \text{ }^\circ\text{C}$ .
